# **Brain Transcriptional Profiles of Male Alternative Reproductive Tactics in Bluegill Sunfish**

Charlyn G. Partridge<sup>\*§</sup>, Matthew D. MacManes<sup>†</sup>, Rosemary Knapp<sup>¶</sup>, Bryan D. Neff<sup>\*</sup>

<sup>\*</sup>Department of Biology, University of Western Ontario, London, ON, N6C 1B1 Canada

<sup>†</sup>Department of Molecular, Cellular, and Biomedical Sciences, University of New Hampshire, Durham, NH 03824, USA

<sup>¶</sup>Department of Biology, University of Oklahoma, Norman, OK 73019, USA

<sup>§</sup>Current address: Annis Water Resources Institute, Grand Valley State University, Muskegon, MI 49441, USA

# **Abstract**

Bluegill sunfish are one of the classic systems for studying male alternative reproductive tactics (ARTs) in teleost fishes. In this species, there are two distinct life histories: parental and cuckolder, encompassing three reproductive tactics, parental, satellite, and sneaker. The parental tactic is fixed, whereas individuals who enter the cuckolder life history transition from the sneaker to the satellite tactic as they grow. For this study, we used RNAseq to characterize the brain transcriptome of the three male tactics during spawning to identify gene categories associated with each tactic and identify potential candidate genes influencing their different spawning behaviors. We found that sneaker males had higher levels of gene differentiation compared to the other two tactics, suggesting that life history does not exclusively drive differential gene expression. Sneaker males had high expression in ionotropic glutamate receptor genes, specifically AMPA receptors, which may be important for increased working spatial memory while attempting to cuckold nests in bluegill colonies. We also found significant expression differences in several candidate genes involved in ARTs that were previously identified in other species and suggest a previously undescribed role for cytosolic 5'-nucleotidase II (*nt5c2*) in influencing parental male behavior during spawning.

## Introduction

Understanding the genetic mechanisms influencing variation in behavior can provide insight into how different behavioral phenotypes within populations evolve and are maintained. One important area of research on behavioral phenotypes focuses on alternative reproductive tactics (ARTs), which are found in a wide array of taxa (Gross 1996; Mank & Avise 2006; Taborsky *et al.* 2008; Taborsky & Brockman 2010). ARTs typically consist of larger males practicing a “territorial” tactic that maintain and protect breeding territories and smaller “sneaking” males that sneak fertilizations rather than compete with territorial males (Taborsky 1998). The mechanisms underlying the expression of ARTs can differ significantly across species. In some cases, tactics are fixed for life (fixed tactics) (Taborsky 1998) and often represent distinct life histories. Fixed tactics can occur through either inherited genetic polymorphisms (Lank *et al.* 1995; Shuster & Sassaman 1997), condition-dependent switches that are triggered prior to sexual maturation (Taborsky 1996; Gross 1996; Gross & Repka 1998), or a combination of genetic and environmental factors (Piché *et al.* 2008, Neff & Svensson 2013). In other cases, individuals can exhibit different tactics throughout their reproductive life, either as they grow or in response to changing social context (plastic tactics or status-dependent tactics) (Gross 1996; Taborsky 1996; Taborsky *et al.* 2008). Recent advances in genome sequencing, such as RNA sequencing (RNAseq), now allow behavioral ecologists to explore what genetic pathways contribute to behavioral variation among mating tactics and examine if the pathways differ among species or between individuals that exhibit fixed versus plastic tactics.

Over the past few years there have been numerous studies examining how differences in gene expression correlate with behaviors adopted by male ARTs (Aubin-Horth *et al.* 2005; Renn *et al.* 2008; Fraser *et al.* 2014; Schunter *et al.* 2014; Stiver *et al.* 2015). Most of these studies have found a large number of genes within the brain that vary in expression among tactics during mating. For example, a recent study examining gene expression differences in the ocellated wrasse (*Symphodus ocellatus*) found 1,048 differentially expressed genes when comparing sneakers to two other male tactics (nesting and satellite) and to females (Stiver *et al.* 2015). In the black-faced blenny (*Tripterygion delaisi*), RNAseq identified approximately 600 transcripts differentially expressed within the brains of sneaker versus territorial males (Schunter *et al.* 2014). In a third study, approximately 2,000 transcripts were differentially expressed between intermediately-sized sailfin molly (*Poecilia latipinna*) males that primarily perform courtship behaviors compared to small males that only perform sneaking behaviors (Fraser *et al.* 2014). Changes in social context also led to a larger response (i.e. changes in gene expression) in intermediately-sized males that show higher levels of tactic plasticity when compared to small sneaker males (Fraser *et al.* 2014), suggesting that genes driving neural response during mating may differ between plastic and fixed tactics.

With the increase in genomic studies examining differential gene expression among male ARTs, there are a growing number of candidate genes suggested to drive the behavioral differences among tactics. Schunter *et al.* (2014) proposed a list of potential candidate genes based on a number of studies that included gonadotropin releasing hormone (*gnrh*), arginine vasotocin (*avt*), cytochrome P450

family 19 subfamily A polypeptide 1 (*cyp19a1*), ependymin (*epd*), galanin (*gal*),  
stomatostatin (*sstr1* and *sstr3*), and early growth response 1 (*egr1*). Many of these  
genes are involved in hormone regulation and mating behavior, and differences in  
expression levels have been observed among mating tactics in different fish species  
(Table 1). For example, the product of the *cyp19a1b* gene is aromatase B, a key  
enzyme responsible for the conversion of androgens to estrogens within radial glial  
cells of adult fish (Forlano and Bass 2005; Le Page *et al.* 2010). *Cyp19a1* plays an  
important role in sex determination and sex change in fish (Nakamura & Kobayashi  
2005; Black *et al.* 2005; Marsh *et al.* 2006) and higher levels of gene expression have  
been observed in territorial males compared to sneaker males in peacock blennies  
(*Salaria pavo*) (Gonçalves *et al.* 2008), black-faced blennies (*Tripterygion delaisi*)  
(Schunter *et al.* 2015), and an African cichlid (*Astatotilapia burtoni*) (Renn *et al.*  
2008). As more genomic data become available, the number of candidate genes in  
this list will likely increase and evaluating gene responses across taxa will aid in  
determining whether similar genetic pathways drive ART behaviors across different  
species.

One of the best-studied fish species with male ARTs is the bluegill sunfish  
(*Lepomis macrochirus*). In this species, males have two distinct life histories:  
parental and cuckolder. In Lake Opinicon (Ontario, Canada), parental males mature  
at around seven years old and construct nests, court females, and provide care to  
young (Gross 1982). Cuckolder males mature at a significantly younger age, around  
two years old (Gross 1982). Rather than competing with parental males for access  
to females, cuckolders initially use a “sneaking” tactic to dart in and out of nests

while parental males and females are spawning. As they grow, typically around an age of 4 years, cuckolder males transition into “satellite” males by taking on female-like coloration and behaviors (Dominey 1980; Gross 1982). Satellite males use this female mimicry to deceive a parental male that he has two true females in his nest (Neff & Gross 2001). The parental and cuckolder life histories are fixed – once a male adopts the parental or cuckolder life history, he remains in that life history for life (Gross & Charnov 1980). However, within the cuckolder life history, mating tactics are ontologically plastic, with males apparently transitioning from the sneaker tactic to the satellite tactic as they age (Gross & Charnov 1980).

While the spawning behavior, reproductive success, and hormone profiles of bluegill have been studied extensively (Gross & Charnov 1980; Kindler *et al.* 1980; Kindler *et al.* 1991; Neff 2001; Neff 2004; Knapp & Neff 2007), the genetic factors influencing behavioral differences during spawning are less clear (Partridge *et al.* 2015). Thus, for this study, we used RNAseq to characterize the brain transcriptome of the three spawning male tactics (parental, sneaker, and satellite), in addition to non-spawning parental males, to examine how differences in gene expression may relate to behavioral variation among the tactics. Specifically, we (1) assessed whether or not there is a greater difference in gene expression profiles between fixed tactics (parental versus the two cuckolder tactics) than between tactics within a plastic life history (sneaker versus satellite), (2) identified specific gene categories that are expressed for each tactic, and (3) examined the expression of potential candidate genes associated with ARTs from other fish species to determine if they also differentiate the ARTs in bluegill.

## Methods and Materials

### Bluegill Sampling

In June 2013, bluegill sunfish were collected from Lake Opinicon near Queen's University Biological Station (QUBS), Elgin, Ontario, Canada. A total of 12 parental males, 12 sneaker males, 13 satellite males, and 12 females were collected in the act of spawning directly from the bluegill colony. An additional 12 non-nesting parental males were collected four days prior to spawning (as determined once spawning at these colonies began). Individuals were euthanized using clove oil, total body length was measured, and brains were immediately dissected out and stored in RNAlater (Life Technologies, Carlsbad, CA). Brains remained in RNAlater at 4°C for 24 hours and were then transferred to fresh cryovials, flash frozen, and kept in liquid nitrogen until they were transported on dry ice to the University of Western Ontario. Samples were then stored at -80°C until RNA extraction.

### Total RNA Extraction

Total RNA was extracted using a standard Trizol (Life Technologies, Carlsbad, CA) extraction. RNA was submitted to the London Genomics Center at the University of Western Ontario and quality was assessed using a 2100 Bioanalyzer (Agilent Technologies, Palo Alto, CA). Four individuals from each group (spawning parental males, non-spawning parental males, sneaker males, satellite males, and females), for a total of 20 individuals, were submitted to the Michigan State University Research Technology Support Facility - Genomics Center for cDNA

Library Construction and Sequencing. Individuals used for this study had RIN (RNA Integrity Number) values ranging from 9.2-9.9.

# cDNA Library Construction and Sequencing

The cDNA libraries were constructed for each individual using Illumina TrueSeq Stranded mRNA Library Preparation Kits LT (Illumina, San Diego, CA), with each individual receiving a uniquely identifiable index tag. The quality of each library was evaluated and the 20 individuals were multiplexed into a single sample that was subsequently run on two lanes of an Illumina HiSeq2500 Rapid Run flow cell (v1). Sequencing was performed on paired end 2 x 150 bp format reads and bases were called using Illumina Real Time Analysis software (v1.17.21.3). Reads from each individual were identified based on their unique index tag, separated, and converted to fastq files using Illumina Bcl2fastq v1.8.4. Sequencing produced an average of 14.5 million reads per individual, with over 90% of the reads having a Q-score >30.

# De novo Transcriptome Assembly and Reference Transcriptome

Prior to assembly, read quality was assessed using FastQC (<http://www.bioinformatics.babraham.ac.uk/projects/fastqc>). Nucleotides whose quality score was below PHRED=2 were trimmed using Trimmomatic version 0.32 (Bolger *et al.* 2014), following recommendations from MacManes (2014). The reference transcriptome was assembled *de novo* using Trinity version 2.04 (Haas *et al.* 2013, Grabherr *et al.* 2011). One representative of each of the five groups



(spawning parental male, non-spawning parental male, sneaker male, satellite male, and female) was used to construct a combined reference transcriptome. The five representatives selected for the reference were the individuals with the highest number of reads within their group and, a total of 85 million paired-end reads were assembled. The assembly was conducted with both normalized and non-normalized reads and normalization was performed using Trinity's *in silico* normalization program. To test the completeness of the transcriptome, reads from samples not used in the assembly were mapped back to the transcriptome using Burrows-Wheeler Aligner (bwa)-mem version 0.7.12 (Li 2013), and >90% of those reads aligned, which is comparable to the rate of mapping for the individuals used in the assembly (92%).

TransDecoder was used to identify protein-coding regions within the assembled transcriptome. Transcripts that contained protein-coding regions or transcripts that blasted to complete coding sequences (cds) and non-coding RNA (ncRNA) from *Tetraodon nigroviridis*, *Lepisosteus oculatus*, *Xiphophorus maculatus*, *Oryzias latipes*, *Takifugu rubripes*, *Latimeria chalumnae*, *Astyanax mexicanus*, *Danio rerio*, or *Poecilia formosa* (downloaded from Ensembl) comprised the reference transcriptome used for both read alignment and to estimate transcript counts.

## Read Alignment and Transcript Counts

Reads from each individual were separately aligned to the reference transcriptome using bwa-mem 0.7.10 (Li 2013). At least 85% of all reads from each

individual mapped back to the reference, with the majority aligning 90% of reads or higher. The sequence alignment/map (sam) files were then converted to a binary format (bam) using Samtools 0.1.19 (Li *et al.* 2009). Transcript counts for each individual were obtained using the program eXpress 1.5.1 (Roberts & Pachter 2013). Differential gene expression was determined using the R statistical package edgeR 3.6.8 (Robinson *et al.* 2010). Low abundance transcripts were filtered out, leaving 19,804 transcripts for differential analysis. Transcript counts were normalized to account for differences in cDNA library size among individuals and dispersion parameters were estimated using Tagwise dispersion estimates. Differences in gene expression comparing paired treatments were calculated using an Exact-test for binomial distribution. Genes with p-values lower than 0.05 after false discovery rate (FDR) correction were determined to be statistically significant. Multidimensional clustering analysis was used to cluster individuals together based on the biological coefficient of variation.

## Gene Annotation and Enrichment Analysis

Both the reference transcriptome and transcripts differentially expressed among groups were blasted using Blastx against a custom-assembled fish protein database. This database consisted of Ensembl protein databases of 13 different fish species: Amazon molly (*Poecilia formosa*), zebrafish (*Danio rerio*), blind cave tetra (*Astyanax mexicanus*), cod (*Gadus morhua*), coelacanth (*Latimeria chalumnae*), Japanese pufferfish (*Takifugu rubripes*), sea lamprey (*Petromyzon marinus*), medaka (*Oryzias latipes*), platyfish (*Xiphophorus maculatus*), spotted gar (*Lepisosteus*

*oculatus*), three-spined stickleback (*Gasterosteus aculeatus*), green-spotted pufferfish (*Tetradon nigroviridis*), and Nile tilapia (*Oreochromis niloticus*). Blast hits with e-values less than  $1 \times 10^{-10}$  were considered significant. Ensembl IDs from the blast hits were then converted into GO term identifiers using Biology Database Network (bioDBnet) (<http://biodbnet.abcc.ncifcrf.gov/db/dbFind.php>).

For purposes of gene annotation and enrichment analysis, we focused on transcripts within the reference transcriptome that were not filtered out of the data set due to low transcript expression (total of 19,804 transcripts). To examine which GO terms were significantly enriched within this set, unique Ensembl IDs from Blastx were converted to Ensembl IDs associated with stickleback homologs using the R package biomaRt 2.20.0. Enrichment analysis was then conducted on the homologs using the BioMart portal (<http://central.biomart.org/enrichment>).

For the transcripts that were differentially expressed among behavioral groups, enrichment analysis was conducted using a Fisher Exact test to examine whether the proportion of genes within each GO category was significantly higher than what would be expected based upon the proportion of genes assigned to that GO term within the reference transcriptome. To ensure adequate statistical power, only GO terms with at least 10 transcripts within each category were included in the statistical analysis. A FDR correction was applied to control for multiple testing and GO terms with p-values  $< 0.05$  were considered to be significant.

# Results

## Reference Transcriptome

This study presents the first reference transcriptome for the brain of bluegill sunfish. The fully assembled transcriptome consisted of 272,189 transcripts. Of these, 72,189 transcripts contained complete coding sequences or blasted to cds or ncRNA from the customized Ensembl fish database. These 72,189 transcripts were then used as the reference transcriptome for alignment and mapping. The mean transcript length within the reference transcriptome was 2,024 bp, with N50 = 3,106 bp and N90 = 1,018 bp. The largest transcript consisted of 27,880 bp. Approximately 82% of the transcripts had only one isoform, while 18% (12,951 transcripts) had two or more isoforms.

For GO enrichment analysis, we only examined the 19,804 transcripts within the reference transcriptome that passed the filtering process. Of these, 18,108 had significant Blastx hits with Ensembl gene IDs (Table S1, Supporting Information), of which 12,224 transcripts had stickleback homologs that could be used to examine GO term enrichment for bluegill sunfish compared to the stickleback genome. The GO terms with significant enrichment included translation, catabolism, vesicle-mediated transport, biosynthesis, small molecule metabolism, and generation of precursor metabolites and energy (Fig. 1 A & B).

## Differential Gene Expression among Groups

Based on the biological coefficient of variation, sneaker males grouped separately from the other male tactics. However, non-spawning parental males, spawning

parental males, and satellite males showed a large amount of overlap in how transcripts varied in their expression levels (Fig. 2). The largest number of differentially expressed genes was observed when comparing spawning parental males to sneaker males, followed by satellite males compared to sneaker males, spawning parental males compared to satellite males, and then spawning parental males compared to non-spawning parental males (Table 2). Analysis of sex differences in differential expression will be presented in a companion paper (Partridge et al. *in preparation*).

### *Differential Expression between Life Histories*

Spawning Parental Males versus Sneaker Males. A total of 9,279 transcripts were differentially expressed between parental males and sneaker males. Of these, 4,537 showed higher expression in parental males (Table S2, Supporting Information), and 4,742 transcripts showed higher expression in sneaker males (Table S3, Supporting Information). Enrichment analysis of GO terms associated with differentially expressed genes showed that the biological processes most enriched in parental males included translational initiation, translation elongation, and oxidation-reduction processes (Table S4, Supporting Information). The molecular function GO terms associated with translational processes included structural constituents of the ribosome and translation initiation factor activity (Table S4, Supporting Information). Biological processes enriched with genes displaying higher expression in sneaker males included ion transport, hemophilic cell adhesion (primarily due to protocadherin- and cadherin-related genes), the ionotropic

glutamate receptor signaling pathway, protein phosphorylation, and synaptic transmission (Fig. 3A). Similarly, significantly enriched molecular function terms included ionotropic glutamate receptor activity and protein binding (Table S4, Supporting Information).

Spawning Parental Males versus Satellite Males. A total of 1,141 transcripts were differentially expressed between parental males and satellite males. Of these, 676 displayed higher expression in parental males (Table S5, Supporting Information) and 465 showed higher expression in satellite males (Table S6, Supporting Information). Only one GO term related to biological processes was enriched in parental males compared to satellite males and this was oxidation-reduction processes. Significantly enriched molecular functions included iron ion binding, oxidoreductase activity, and heme binding. Biological process terms enriched with genes showing higher expression in satellite males included ion transport, and enriched molecular function terms included nucleic acid binding, ion channel activity, and GTP binding (Table S4, Supporting Information).

#### *Differential Expression within Life Histories*

Satellite Males versus Sneaker Males. There were 2,590 transcripts differentially expressed between satellite males and sneaker males. Of these transcripts, 1,261 showed higher expression in satellite males (Table S7, Supporting Information), and 1,329 showed higher expression in sneaker males (Table S8, Supporting Information). Biological processes enriched with genes displaying higher expression

in satellite males included translation, embryo development, and cell cycle regulation. Molecular processes enriched in satellite males included structural constituents of the ribosome, heme binding, and oxidoreductase activity (Table S4, Supporting Information). Transcripts showing higher expression in sneaker males were involved in biological processes related to ionotropic glutamate receptor signaling pathways and mRNA processing (Fig. 3B). Molecular functions were primarily related to ionotropic glutamate receptor activity and protein binding (Table S4, Supporting Information).

Spawning Parental Males versus Non-Spawning Parental Males. A total of 137 transcripts were differentially expressed between spawning and non-spawning parental males. The majority of these transcripts (132 transcripts) showed higher expression in spawning males (Table S9, Supporting Information). Genes with the highest expression in spawning males compared to non-spawning males were MHC II antigen beta chain, cytosolic 5'-nucleotidase II (*nt5c2*), cAMP responsive element modulator (*crem*), cysteine dioxygenase type 1 (*cdo1*), and an uncharacterized protein. Only eight transcripts showed higher expression in non-spawning parental males. These were nuclear receptor subfamily 1 group D member 4b (*nr1d4b*), neuronal tyrosine-phosphoinositide-3-kinase adaptor 2 (*nyap2*), sphingosine-1-phosphate receptor 4 (*s1pr4*), gamma-aminobutyric acid A receptor beta 3 (*gabrb3*), and four uncharacterized proteins. Due to the limited number of transcripts differentially expressed between these two groups, the number of transcripts

assigned to each GO term was too small to have adequate statistical power to perform an enrichment analysis for this comparison.

### *Potential Candidate Genes Associated with ART Spawning Behavior*

We observed differential expression in a number of transcripts previously identified as potential candidate genes (described in Table 1) associated with differences in ART spawning behaviors (Table 3). In our data set, the candidate genes cytochrome P450 family 19 subfamily A polypeptide 1b (*cyp19a1b*), ependymin (*epd*), and galanin (*gal*) showed higher expression in parental males compared to sneaker males. *Epd* also had higher expression in satellite males compared to sneakers. Early growth response 1 (*egr1*) showed higher expression in both satellite and sneaker males relative to spawning parental males. Somatostatin 1 (*sstr1*) showed higher expression in sneaker males compared to satellite males, but no differences in other comparisons between tactics. No differences in expression related to gonadotropin releasing hormone (*gnrh*), arginine vasotocin (*avt*), or somatostatin 3 (*sstr3*) were observed between any of our groups.

In addition to these previously identified candidate genes, transcripts that displayed some of the highest differences in expression between parental males and all other male phenotypes (including non-spawning males) were related to cytosolic 5'-nucleotidase II (*nt5c2*). Multiple isoforms were expressed, with log2 fold changes ranging from 1.5 – 4.8 times higher in parental males compared to other male groups (Fig. 4). Consistent with the finding for GO term enrichment, transcripts that showed the highest levels of expression in sneaker males compared to other groups



were related to glutamate receptor genes, particularly AMPA ionotropic glutamate receptors (Table S3, Supporting Information).

## Discussion

Bluegill sunfish are a classic system for examining behavioral differences in ARTs. In this study, we generated and assembled the first bluegill brain transcriptome, and we identified candidate genes that contribute to differences in male spawning tactics. The main differences in gene expression were found between sneaker males when compared to the two other male tactics. Generally, sneaker males showed higher expression in transcripts influencing neural activity, whereas parental and satellite males exhibited higher expression in genes related to translation and oxidoreductase activity.

One of our key findings is that a shared life history does not appear to be a driving factor influencing similarity in gene expression in the brain of male tactics. In bluegill, parental and cuckolder life histories are fixed, but within the cuckolder life history, males transition from the sneaking to the satellite tactic as they age (Gross 1982; Gross & Charnov 1991). Our data showed that, regardless of whether comparisons were made across fixed (parental versus sneaker or parental versus satellite) or plastic (sneaker versus satellite) tactics, sneaker males showed the highest level of differentiation in gene transcription. Similar results have been observed in the ocellated wrasse, *Symphodus ocellatus*, where sneaker males also showed the greatest number of differentially expressed genes compared to nesting and satellite males (Stiver *et al.* 2015). The expression differences in sneakers

compared to the other tactics in bluegill and the ocellated wrasse are likely partially due to age because sneaker males are typically younger than satellite and parental or territorial males. Indeed, a recent study in the short-lived fish *Nothobranchius furzeri* found that genes related to translation elongation and ribosomal proteins are up-regulated with age (Baumgart *et al.* 2014). Both translation elongation and ribosomal proteins showed higher expression in parental and satellite males compared to sneaker males in our data set. Additionally, the behaviors exhibited by sneaker males during spawning differ in fundamental aspects from those of the other male tactics. In the ocellated wrasse, for example, satellite and nesting males cooperatively protect the nest from sneakers and other egg predators (Taborsky *et al.* 1987); in bluegill, satellite and parental males associate closely with the female throughout spawning, whereas sneakers dart in and out of the nest. These differences in spawning tactics likely also contribute to the differences in gene expression observed in the two studies. Thus, age and spawning tactic are important contributors to gene expression patterns across ARTS, and life history is not exclusively responsible for these differences.

Identifying distinct gene categories expressed by one ART type compared to another provides information regarding the genes influencing behavioral differences during spawning. Previous studies in sailfin mollies, *Poecilia latipinna*, and Atlantic salmon, *Salmo salar*, indicate that sneaker males have increased expression in genes related to neurotransmission and learning (Aubin-Horth *et al.* 2005; Fraser *et al.* 2014). We found that the GO terms consistently enriched in bluegill sneaker males compared to both parental and satellite males were the

ionotropic glutamate signaling pathway and ionotropic glutamate receptor activity. Ionotropic glutamate receptors are primarily excitatory neurotransmitter receptors and play an important role in fast synaptic transmission (reviewed in Lamprecht & LeDoux 2004). Two of these receptors, NMDA and AMPA, play important roles in memory function and spatial learning (reviewed in Riedel *et al.* 2003). Blocking NMDA receptors impairs learning new spatial locations in goldfish (Gómez *et al.* 2006). Furthermore, mice with impaired AMPA receptors, while showing normal spatial learning, have impaired working spatial memory (i.e. their ability to alter their spatial choice in response to changing environments is impaired) (Reisel *et al.* 2002). We propose that increased expression of genes related to spatial memory, particularly related to working spatial memory, could be important for bluegill sneakers during spawning as they attempt to gain access to nests while avoiding detection not only by the parental males, but also predators that are common around the colony (Gross & MacMillan 1981). Bluegill sneakers must also position themselves in close proximity to females so they can time sperm release to coincide with female egg release (Stoltz & Neff 2006). Similarly, sailfin molly sneakers, who also show enrichment in ionotropic glutamate related genes (Fraser *et al.* 2014), probably benefit from increased working spatial memory because they must successfully position themselves by the female for quick and successful copulations. In this context, increased expression in gene pathways that improve neural function related to working spatial memory are probably especially beneficial to the sneaker tactic to increase their reproductive success.

There are a number of candidate genes that have been proposed to drive the expression of alternative mating tactics (Schunter *et al.* 2015). In our study of bluegill, we corroborate some of these candidates. For example, *cyp19a1b*, *epd*, and *gal* had higher expression levels in parental males compared to sneaker males. The expression patterns for all three genes are similar to what has been observed in cichlids (Renn *et al.* 2008). In addition, expression of *epd* is lower in rainbow trout, *Oncorhynchus mykiss*, males that use a sneaking tactic versus males that are dominant and territorial (Sneddon *et al.* 2011), which is also consistent with our findings. In contrast, the one candidate gene that responded opposite to expectations was *egr1*. *Egr1* expression was lower in bluegill parental males compared to sneaker or satellite males although previous work on cichlids found that expression of this gene increases when subdominant males transition into dominant males (Burmeister *et al.* 2005). However, *egr1* is an important transcription factor involved in neural plasticity (Jones *et al.* 2001), so it may be involved in regulating the switch from one tactic to another. Consequently, in bluegill, this gene would be more important for individuals that alter their tactic (sneaker to satellite) than for the fixed parental tactic. Taken together, our results corroborate a role for *cyp19a1b*, *epd*, *gal*, and *egr1* as candidate genes contributing to behavioral differences in ARTs across species.

We also found a transcript that may have a previously unrecognized function in influencing male spawning behavior. Transcripts corresponding to splice variants of cytosolic 5'-nucleotidase II (*nt5c2*) were significantly higher in parental males when compared to all other male groups, including non-spawning males. The

protein product of *nt5c2* regulates purine metabolism (Bretonnet *et al.* 2005; Walldén *et al.* 2007). Moreover, in the African cichlid, *A. burtoni*, uridine kinase (*udk*) expression, a gene with similar function to *nt5c2*, is significantly higher in dominant relative to subordinate males (Renn *et al.* 2008). While neither *nt5c2* nor *udk* have been directly associated with spawning behavior in fishes, there is evidence suggesting that altered expression levels of *nt5c2* in the brain can significantly influence anxiety, mania, schizophrenia, and aggressive behaviors in humans (Page *et al.* 2007), and altering levels of uridine in mice affects their level of aggression toward an intruder (Kawasaki *et al.* 2013). Furthermore, in bluegill, parental males display high levels of aggression to obtain nesting sites, circumvent cuckoldry, and prevent egg predation by brood predators (Avila 1976; Colgan *et al.* 1979; Gross 1979; Gross & Macmillian 1981). The high levels of *nt5c2* expression in spawning parental males suggests that this gene may have a role in influencing parental male spawning behaviors in bluegill. Future work should examine how *nt5c2* influences mating behaviors in the ARTs of this and other species.

In summary, our work describes differences in gene expression profiles in the brains of bluegill male ARTs during spawning. The largest differences in expression levels were observed when comparing sneakers to parental and satellite males, suggesting that, in bluegill, tactic is more related to differences in gene expression than is life history. Consistent with other studies, our work demonstrates that sneaker males have greater expression of genes involved in neural function relative to more territorial-type males, particularly in relation to working spatial memory, as mediated by ionotropic glutamate receptors. We found support for the

previously identified candidate genes *cyp19a1b*, *epd*, *gal*, and *egr1* contributing to behavioral differences in ARTs, but we also show evidence for a novel candidate gene, *nt5c2*, implicated in these differences. We suggest that *nt5c2* may have a role in mediating courtship or territorial behaviors within this species, and we recommend that future work should characterize this gene further in other species.

# Acknowledgments

We thank Scott Colborne for his help in collecting bluegill, Dave Bridges for providing the R script to convert Ensemble IDs to stickleback homologs, and David Winter and Jeramia Ory for providing Python script used in the bioinformatics analyses. We also thank Shawn Garner, Tim Hain, Lauren Kordonowy, and Lindsay Havens for helpful comments on the manuscript. Funding for this project was supported through the Natural Sciences and Engineering Research Council of Canada (NSERC) to B.D.N. and the University of Oklahoma Department of Biology to R.K.

## References

- Avila VL (1976) A field study of nesting behavior of male bluegill sunfish (*Lepomis macrochirus* Rafinesque). *American Midland Naturalist*, **96**, 195-206.
- Aubin-Horth N, Landry CR, Letcher BH, Hofmann HA (2005) Alternative life histories shape brain gene expression profiles in males of the same population. *Proceedings of the Royal Society B: Biological Sciences*, **272**, 1655-1662.
- Baumgart M, Groth, M, Priebe S, Savino A, Testa G, Dix A, Ripa R, Spallotta F, Gaetano C, Ori M, Tozzini ET, Guthke R, Platzer M, Cellerino A (2014) RNA-seq of the aging brain in the short-lived fish *N. furzeri* – conserved pathways and novel genes associated with neurogenesis. *Aging Cell*, **13**, 965-974.
- Black MP, Balthazart J, Baillien M, Grober MS (2005) Socially induced and rapid increases in aggression are inversely related to brain aromatase activity in a sex-changing fish, *Lythrypnus dalli*. *Proceedings of the Royal Society of London B: Biological Sciences*, **272**, 2435-2440
- Bloch GJ, Butler PC, Kohlert JG, Bloch DA (1993) Microinjection of galanin into the medial preoptic nucleus facilitates copulatory behavior in the male rat. *Physiology and Behavior*, **54**, 615-624.
- Bolger AM, Lohse M, Usadel B (2014) Trimmomatic: A flexible trimmer for Illumina sequence data. *Bioinformatics*, btf170.
- Bretonnet AS, Jordheim LP, Dumontet C, Lancelin JM (2005) Regulation and activity of cytosolic 5' nucleotidase II: A bifunctional allosteric enzyme of the Haloacid Dehalogenase superfamily involved in cellular metabolism. *FEBS Letters*, **579**, 3363-3368.
- Burmeister SS, Jarvis ED, Fernald RD (2005) Rapid behavioral and genomic responses to social opportunity. *PLOS Biology*. e363
- Colgan PW, Nowell WA, Gross MR, Grant JW (1979) Aggressive habituation and rim circling in the social organization of bluegill sunfish (*Lepomis macrochirus*). *Environmental Biology of Fishes*, **4**, 29-36.
- Dominey WJ (1980) Female mimicry in male bluegill sunfish – a genetic polymorphism? *Nature*, **284**, 546-548.
- Forlano PM, Bass AH (2005) Seasonal plasticity of brain aromatase mRNA expression in glia: divergence across sex and vocal phenotypes. *Neurobiology*, **65**, 37-49.

- Fraser BA, Janowitz I, Thairu M, Travis J, Hughes KA (2014) Phenotypic and genomic plasticity of alternative male reproductive tactics in sailfin mollies. *Proceedings of the Royal Society B: Biological Sciences*, **281**, 20132310.
- Gonçalves D, Teles M, Alpedrinha J, Oliveira RF (2008) Brain and gonadal aromatase activity and steroid hormone levels in female and polymorphic males of the peacock blenny *Salaria pavo*. *Hormones and Behavior*, **54**, 717-725.
- Gómez Y, Vargas JP, Portavella M, López JC (2006) Spatial learning and goldfish telencephalon NMDA receptors. *Neurobiology of Learning and Memory*, **85**, 252-262.
- Grabherr MG, Haas BJ, Yassour M, Levin JZ, Thompson DA, Amit I, Adiconis X, Fan L, Raychowdhury R, Zeng Q, Chen Z, Mauceli E, Hacohen N, Gnirke A, Rhind N, di Palma F, Birren BW, Nusbaum C, Lindblad-Toh K, Friedman N, Regev A (2011) Full-length transcriptome assembly from RNA-Seq data without a reference genome. *Nature Biotechnology*, **29**, 644-652.
- Greenwood AK, Wark AR, Fernald RD, Hofmann HA (2008) Expression of arginine vasotocin in distinct preoptic regions is associated with dominant and subordinate behaviour in an African cichlid fish. *Proceedings of the Royal Society B: Biological Sciences*, **275**, 2393-2402.
- Grober MS, George AA, Watkins KK, Carneiro LA, Oliveira RF (2002) Forebrain AVT and courtship in fish with male alternative reproductive tactics. *Brain Research Bulletin*, **57**, 423-425.
- Gross MR (1979) Cuckoldry in sunfishes (*Lepomis*: Centrarchidae). *Canadian Journal of Zoology*, **57**, 1507-1509.
- Gross MR (1982) Sneakers, satellites and parentals: Polymorphic mating strategies in North American sunfishes. *Zeitschrift für Tierpsychologie*, **60**, 1-26.
- Gross MR (1996) Alternative reproductive strategies and tactics: diversity within sexes. *Trends in Ecology and Evolution*, **11**, 92-98.
- Gross MR, Charnov EL (1980) Alternative male life histories in bluegill sunfish. *Proceedings of the National Academy of Sciences USA*, **77**, 6937-6940.
- Gross MR, MacMillian AM (1981) Predation and the evolution of colonial nesting in bluegill sunfish (*Lepomis macrochirus*). *Behavioral Ecology and Sociobiology*, **8**, 163-174.
- Gross MR, Repka J (1998) Stability with inheritance in the conditional strategy. *Journal of Theoretical Biology*, **192**, 445-453.



- Haas BJ, Papanicolaou A, Yassour M, Grabherr M, Blood PD, Bowden J, Couger MB, MacManes MD, Ott M, Orvis J, Pochet N, Strozzi F, Weeks N, Westerman R, William T, Dewey CN, Henschel R, LeDuc RD, Friedman N, Regev A (2013) *De Novo* transcript sequence reconstruction from RNA-Seq using the Trinity platform for reference generation and analysis. *Nature Protocols*, **8**, 1494–1512.
- Jones MW, Errington ML, French PJ, Fine A, Bliss TVP, Garel S, Charnay P, Bozon B, Laroche S, Davis S (2001) A requirement for the immediate early gene *Zif268* in the expression of LTP and long-term memories. *Nature Neuroscience*, **4**, 289-296.
- Kindler PM, Philipp DP, Gross MR, Bahr JM (1989) Serum 11-ketotestosterone and testosterone concentrations associated with reproduction in male bluegill (*Lepomis macrochirus*: Centrarchidae). *General and Comparative Endocrinology*, **75**, 446–453.
- Kindler PM, Bahr JM, Philipp DP (1991) The effects of exogenous 11-ketotestosterone, testosterone, and cyproterone acetate on prespawning and parental care behaviors of male bluegill. *Hormones and Behavior*, **25**, 410–423.
- Kawasaki A, Suzuki N, Endo K, Ashida N (2013) Novel effects of uridine on behavioral changes due to social isolation stress in mice. *Food Science and Technology Research*, **19**, 455-461.
- Knapp R, Neff BD (2007) Steroid hormones in bluegill, a species with male alternative reproductive tactics including female mimicry. *Biology Letters*, **3**, 628-631.
- Lank DB, Smith CM, Hanotte O, Burke T, Cooke F (1995) Genetic polymorphism for alternative mating behaviour in lekking male ruff *Philomachus pugnax*. *Nature*, **378**, 59-62.
- Lamprecht R, LeDoux J (2004) Structural plasticity and memory. *Nature Reviews Neuroscience*, **5**, 45-54.
- Le Page Y, Diotel N, Vaillant C, Pellegrini E, Anglade I, Mérot Y, Kah O (2010) Aromatase, brain sexualization and plasticity: the fish paradigm. *European Journal of Neuroscience*, **32**, 2105-2115.
- Li H (2013) Aligning sequence reads, clone sequences and assembly contigs with BWA-MEM. [arXiv:1303.3997v2](https://arxiv.org/abs/1303.3997v2) [q-bio.GN]
- Li H, Handsaker B, Wysoker A, Fennell T, Ruan J, Homer N, Marth G, Abecasis G, Durbin R, 1000 Genome Project Data Processing Subgroup (2009) The

- Sequence alignment/map (SAM) format and SAMtools. *Bioinformatics*, **25**, 2078-2079.
- MacManes MD (2014) On the optimal trimming of high-throughput mRNA sequence data. *Frontiers in Genetics*, **5**, 13. doi:10.3389/fgene.2014.00013.
- Mank JE, Avise JC (2006) The evolution of reproductive and genomic diversity in ray-finned fishes: insights from phylogeny and comparative analysis. *Journal of Fish Biology*, **69**, 1-27.
- Marsh KE, Creutz LM, Hawkins MB, Godwin J (2006) Aromatase immunoreactivity in the bluehead wrasse brain, *Thalassoma bifasciatum*: Immunolocalization and co-regionalization with arginine vasotocin and tyrosine hydroxylase. *Brain Research*, **1126**, 91-101.
- Nakamura M, Kobayashi Y (2005) Sex change in coral reef fish. *Fish Physiology and Biochemistry*, **31**, 117-122.
- Neff BD (2001) Genetic paternity analysis and breeding success in bluegill sunfish (*Lepomis macrochirus*). *Journal of Heredity*, **92**, 111-119.
- Neff BD (2004) Increased performance of offspring sired by parasitic males in bluegill sunfish. *Behavioral Ecology*, **15**, 327-331.
- Neff BD, Gross MR (2001) Dynamic adjustment of parental care in response to perceived paternity. *Proceedings of the Royal Society of London B*, **268**, 1559-1565.
- Neff BD, Svensson EI (2013) Polyandry and alternative mating tactics. *Philosophical Transactions of the Royal Society of London B*, **368**, 20120045.
- Page T, Yu A, Fontanesi J, Nyhan WL (1997) Developmental disorder associated with increased cellular nucleotidase activity. *Proceedings of the National Academy of Sciences USA*, **94**, 11601-11606.
- Piché J, Hutchings JA, Blanchard W (2008) Genetic variation in threshold reaction norms for alternative reproductive tactics in Atlantic salmon, *Salmo salar*. *Proceedings of the Royal Society B: Biological Sciences*, **275**, 1571-1575.
- Reisel D, Bannerman DM, Schmitt WB, Deacon RMJ, Flit J, Borchardt T, Seeburg PH, Rawlins JNP (2002) Spatial memory dissociations in mice lacking GluR1. *Nature Neuroscience*, **5**, 868-873.
- Renn SC, Aubin-Horth N, Hofmann HA (2008) Fish and chips: functional genomics of social plasticity in an African cichlid fish. *Journal of Experimental Biology*, **211**, 3041-3056.

- Riedel G, Platt B, Micheau J (2003) Glutamate receptor function in learning and memory. *Behavioural Brain Research*, **140**, 1-47.
- Roberts A, Pachter L (2013) Streaming fragment assignment for real-time analysis of sequencing experiments. *Nature Methods*, **10**, 1-47.
- Robinson MD, McCarthy DJ, Smyth GK (2010) EdgeR: a Bioconductor package for differential expression analysis of digital gene expression data. *Bioinformatics*, **26**, 139-140.
- Schunter C, Vollmer SV, Macpherson E, Pascual M (2014) Transcriptome analysis and differential gene expression in a non-model fish species with alternative mating tactics. *BMC Genomics*, **15**, 167.
- Schuster SM, Sassaman C (1997) Genetic interaction between male mating strategy and sex ratio in a marine isopod. *Nature*, **388**, 373-377.
- Sneddon LU, Schmidt R, Fang Y, Cossins AR (2011) Molecular correlates of social dominance: A novel role for ependymin in aggression. *PLoS One*. **6**, e18181.
- Stiver KA, Harris RM, Townsend JP, Hofmann HA, Alonzo SH (2015) Neural gene expression profiles and androgen levels underlie alternative reproductive tactics in the ocellated wrasse, *Symphodus ocellatus*. *Ethology*, **121**, 152-167.
- Stoltz JA, Neff BD (2006) Male size and mating tactic influence proximity to females during sperm competition in bluegill sunfish. *Behavioral Ecology and Sociobiology*, **59**, 811-818.
- Taborsky M (1998) Sperm competition in fish: 'Bourgeois' males and parasitic spawning. *Trends in Ecology and Evolution*, **13**, 222-227.
- Taborsky M, Brockmann HJ (2010) Alternative reproductive tactics and life history phenotypes. In: *Animal Behavior: Evolution and Mechanisms* (Ed. P. Kappeler). Springer, Berlin, 537-586.
- Taborsky M, Hudde B, Wirtz P (1987) Reproductive behaviour and ecology of *Symphodus* (Crenilabrus) *ocellatus*, a European wrasse with four types of male behaviour. *Behaviour*, **102**, 82-117.
- Taborsky M, Oliveira RF, Brockmann HJ (2008) The evolution of alternative reproductive tactics: concepts and questions. In: *Alternative Reproductive Tactics: An Integrative Approach* (Eds. Oliveira RF, Taborsky M, Brockmann HJ) Cambridge University Press, 1-21.

Thomson JS, Watts PC, Pottinger TG, Sneddon, LU (2011) Physiological and genetic correlates of boldness: Characterizing the mechanisms of behavioral variation in rainbow trout, *Oncorhynchus mykiss*. *Hormones and Behavior*, **59**, 67-74.

Walldén K, Stenmark P, Nyman T, Flodin S, Gräslund S, Loppnau P, Norlund P (2007). Crystal structure of human cytosolic 5'-nucleotidase II. Insights into allosteric regulation and substrate recognition. *Journal of Biological Chemistry*, **282**, 17828-17836.

Wu Z, Autry AE, Bergan JF, Watabe-Uchida M, Dulac CG (2014) Galanin neurons in the medial preoptic area govern parental behavior. *Nature*, **509**, 325-330.

### Author Contribution

C.G.P, R.K., and B.D.N. designed the experiment and collected samples. M.D.M. assembled the transcriptome. C.G.P. performed bioinformatic and statistical analyses and wrote the manuscript. All authors provided comments, contributed to the manuscript, and approved the final manuscript.

### Data Accessibility

All raw sequence files are available on the Sequence Read Archive (SRA) through BioProject ID: PRJNA287763. Environmental data, RNA quality information, assembled transcriptome, the transcript count matrix, and R code for differential gene analysis are available on Dryad (<http://dx.doi.org/10.5061/dryad.82fd8> and <http://dx.doi.org/10.5061/dryad.10hh7>).

### Supporting Information

Table S1: Annotated Reference Transcriptome

Table S2: Transcripts with significantly higher expression in bluegill parental males compared to sneaker males.

747

748 Table S3: Transcripts with significantly higher expression in bluegill sneaker males  
749 compared to parental males.

750

751 Table S4: Biological Process and Molecular Function GO terms that are significantly  
752 enriched with genes differentially expressed between tactics

753

754 Table S5: Transcripts with significantly higher expression in bluegill parental males  
755 compared to satellite males.

756

757 Table S6: Transcripts with significantly higher expression in bluegill satellite males  
758 compared to parental males.

759

760 Table S7: Transcripts with significantly higher expression in bluegill satellite males  
761 compared to sneaker males.

762

763 Table S8: Transcripts with significantly higher expression in bluegill sneaker males  
764 compared to satellite males.

765

766 Table S9: Transcripts with significantly higher expression in spawning parental  
767 males compared to non-spawning parental males.

768

769

Table 1: Proposed candidate genes (Schunter *et al.* 2014) influencing teleost alternative reproductive tactics (ARTs). POA = Pre-optic area

| Proposed Candidate Genes                                                 | Function                                                                                                                                                                                                       | Relationship to ARTs                                                                                                                                                                                                                                                                                                                                   |
|--------------------------------------------------------------------------|----------------------------------------------------------------------------------------------------------------------------------------------------------------------------------------------------------------|--------------------------------------------------------------------------------------------------------------------------------------------------------------------------------------------------------------------------------------------------------------------------------------------------------------------------------------------------------|
| Arginine Vasotocin ( <i>avt</i> )                                        | Non-mammalian homolog of vasopressin. Activates some aspects of sexual behavior                                                                                                                                | ↑ in posterior POA of territorial cichlid males, but ↑ anterior POA of non-territorial (Greenwood <i>et al.</i> 2008); ↓ density of <i>avt</i> mRNA in POA in parental blenny males (Grober <i>et al.</i> 2002)                                                                                                                                        |
| Gonadotrophin Releasing Hormone ( <i>gnrh</i> )                          | Regulates release of lutenizing hormone and follicle-stimulating hormone from the pituitary gland                                                                                                              | ↑ in territorial cichlid males (Renn <i>et al.</i> 2008)                                                                                                                                                                                                                                                                                               |
| Cytochrome P450 family 19, subfamily A, polypeptide 1 ( <i>cyp19a1</i> ) | Brain aromatase. Key enzyme in estrogen biosynthesis                                                                                                                                                           | ↑ in territorial cichlid males (Renn <i>et al.</i> 2008); ↑ territorial blenny males (Gonçalves <i>et al.</i> 2008); ↑ territorial black-faced blenny males (Schunter <i>et al.</i> 2014); ↓ in the sonic motor nucleus of nesting type 1 (territorial) male plainfin midshipmen compared to type II (female mimic) males (Forlano <i>et al.</i> 2005) |
| Ependymin ( <i>epd</i> )                                                 | Glycoprotein associated with neuroplasticity and neuronal regeneration. Also affects aggression levels in zebrafish (Sneddon <i>et al.</i> 2011); associated with stress in trout (Thomson <i>et al.</i> 2011) | ↑ in territorial cichlid males (Renn <i>et al.</i> 2008); ↓ in subordinate trout males (Sneddon <i>et al.</i> 2011)                                                                                                                                                                                                                                    |
| Galanin/GMAP prepropeptide ( <i>gal</i> )                                | Neuropeptide that influences neurotransmitters. Associated with sexual behaviors (Bloch <i>et al.</i> 1993), and parental care (Wu <i>et al.</i> 2014)                                                         | ↑ in territorial cichlid males (Renn <i>et al.</i> 2008)                                                                                                                                                                                                                                                                                               |
| Somatostatin ( <i>sst</i> )                                              | Neuropeptide that regulates endocrine pathways. Also affects neurotransmitters                                                                                                                                 | ↑ in territorial blenny males (Schunter <i>et al.</i> 2014); ↑ in territorial cichlid males (Renn <i>et al.</i> 2008)                                                                                                                                                                                                                                  |
| Early growth response 1 ( <i>egr1</i> )                                  | Transcription factor that influences neural plasticity                                                                                                                                                         | ↑ when subdominant cichlid males switch to dominant (Burmeister <i>et al.</i> 2005)                                                                                                                                                                                                                                                                    |

Table 2: Number of transcripts differentially expressed (DE) between each male bluegill tactic, including the number of transcripts without Blastx hits, the number with unique Ensembl IDs, and the number of transcripts assigned to specific GO terms

| Comparisons             | Num of DE Transcripts | Num of DE Transcripts without Blastx Hits | Num with Unique Ensembl Gene IDs | Num DE Gene IDs with GO Annotation |
|-------------------------|-----------------------|-------------------------------------------|----------------------------------|------------------------------------|
| Parental vs Sneaker     | 9,279                 | 516                                       | 5,396                            | 2,430                              |
| Parental vs Satellite   | 1,141                 | 82                                        | 879                              | 317                                |
| Satellite vs Sneaker    | 2,590                 | 184                                       | 1,852                            | 351                                |
| Parental vs Non-Spawner | 140                   | 6                                         | 102                              | 70                                 |

Table 3: Gene expression differences (Log2 fold change) among male tactics for proposed candidate genes (see Table 1).

| Proposed Candidate Genes                        | Isoform ID   | Comparison between Male Tactics (Log2 Fold Change) |                     |                     |                           |
|-------------------------------------------------|--------------|----------------------------------------------------|---------------------|---------------------|---------------------------|
|                                                 |              | Parent vs Sneak                                    | Parent vs Sat       | Sat vs Sneak        | Non-Spawn vs Spawn Parent |
| Arginine Vasotocin ( <i>avt</i> )               | c34708_g2_i1 | 0.45 [0.32]                                        | -0.98 [0.09]        | 0.54 [0.33]         | -0.74 [0.5]               |
| Gonadotrophin Releasing Hormone ( <i>gnrh</i> ) | 63124_g1_i1  | 0.76 [0.5]                                         | 0.32 [0.87]         | 0.44 [0.77]         | -0.77 [0.88]              |
| Cytochrome P450 19a 1b ( <i>cyp19a1b</i> )      | c48084_g2_i1 | <b>0.93 [0.0002]</b>                               | 0.64 [0.06]         | 0.28 [0.4]          | -0.39 [0.58]              |
| Ependymin ( <i>epd</i> )                        | c44195_g1_i5 | <b>1.54 [1.4 x 10<sup>-8</sup>]</b>                | 0.66 [0.07]         | <b>0.89 [0.007]</b> | 0.51 [0.45]               |
| Galanin/GMAP prepropeptide ( <i>gal</i> )       | c41071_g5_i2 | <b>1.12 [0.0001]</b>                               | 0.53 [0.91]         | -0.59 [0.1]         | -0.09 [0.97]              |
| Somatostatin 1 ( <i>sstr1</i> )                 | c3001_g1_i1  | 0.53 [0.15]                                        | -0.39 [0.49]        | <b>0.93 [0.03]</b>  | -0.27 [0.88]              |
| Somatostatin 3 ( <i>sstr3</i> )                 | c46547_g6_i1 | 0.001 [1]                                          | -0.25 [0.54]        | 0.25 [0.48]         | -0.15 [0.9]               |
| Early growth response 1 ( <i>egr1</i> )         | c37907_g1_i1 | <b>-0.74 [0.02]</b>                                | <b>-0.91 [0.03]</b> | 0.16 [0.72]         | 0.63 [0.42]               |

Values in brackets represent p-values after false discovery rate correction. Values in bold are significant at  $p < 0.05$ . Parent = parental male, Sneak = sneaker male, Sat = satellite male.



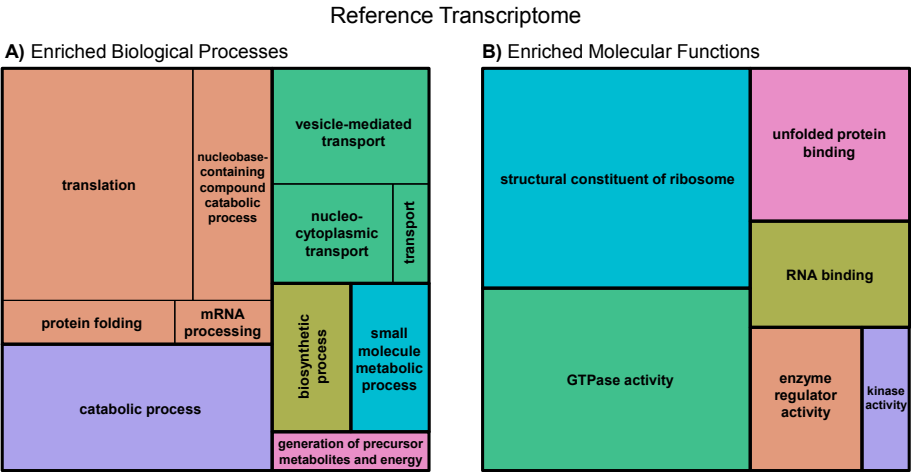

Fig. 1: GO terms related (A) biological processes and (B) molecular function that were significantly enriched in the bluegill reference transcriptome relative to the stickleback genome. Boxes of similar color can be grouped into the same GO term hierarchy. The size of each box reflects the  $-\log_{10}$  p-value of the GO term.

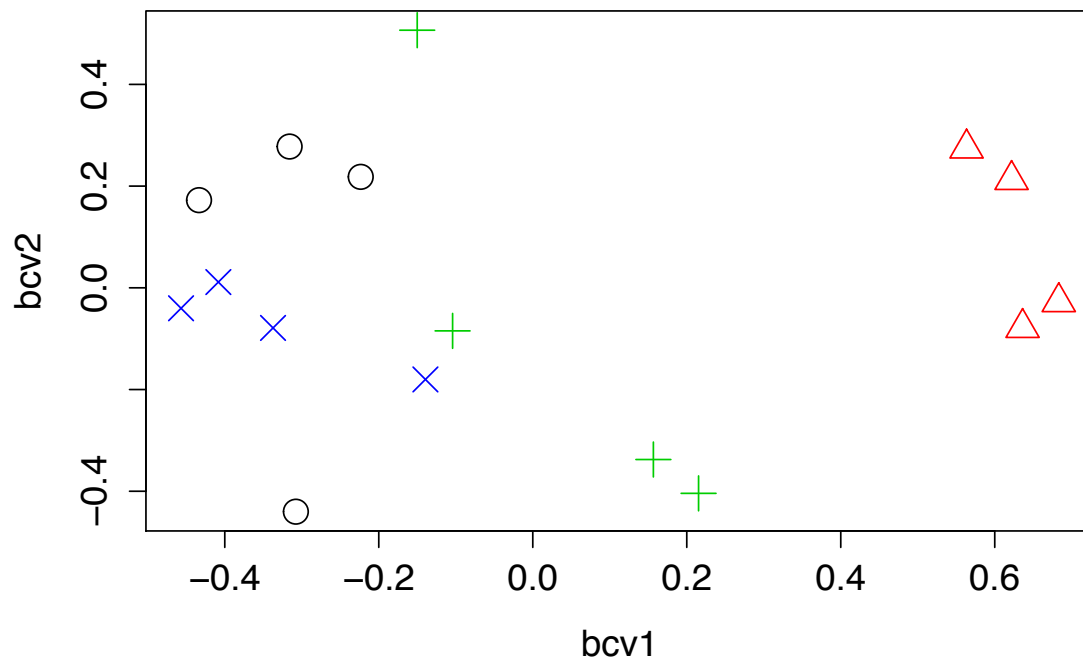

Fig. 2: Multi-dimensional space (MDS) plot based on the biological coefficient of variation (bcv) among bluegill male ARTs. Red triangles: sneaker males, green pluses: satellite males, black circles: spawning parental males, blue x: non-spawning parental males.

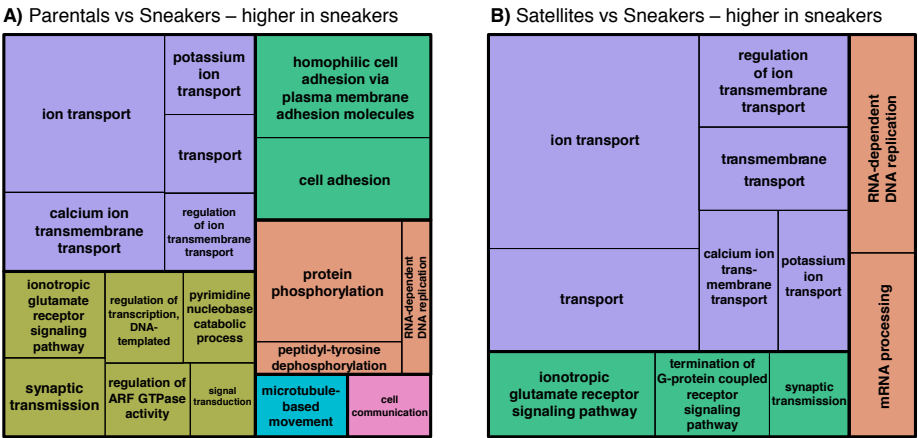

Figure 3: GO terms significantly enriched by genes with higher expression in sneaker males compared to (A) parental males and (B) satellite males. Boxes of similar color are grouped into the same GO term hierarchy. Box size reflects the – log<sub>10</sub> p-value of the GO term.

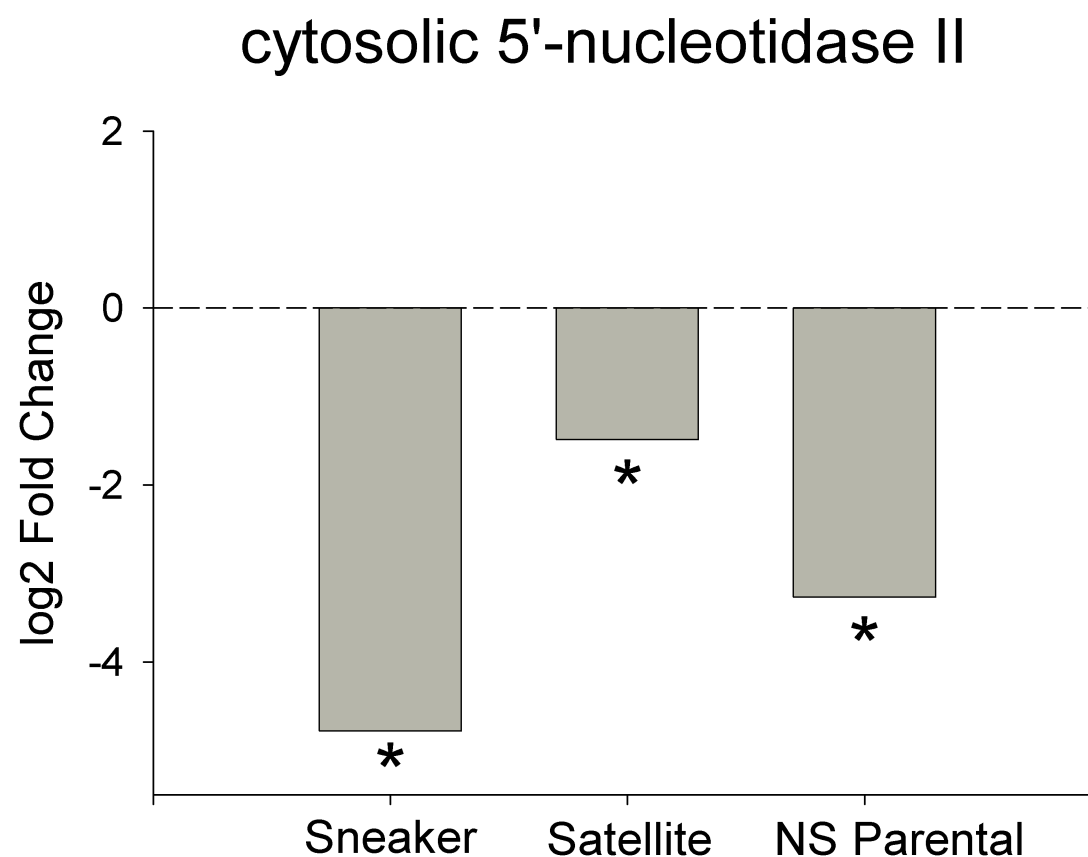

Figure 4: Log2 fold changes of sneaker, satellite, and non-spawning (NS) parental males relative to spawning parental males for cytosolic 5'-nucleotidase II (*nt5c2*). \* indicates fold changes that are significantly different with p-values < 0.05 after FDR correction.
